# Supplementary material for: Targeted Sequencing Reveals Large-Scale Sequence Polymorphism in Maize Candidate Genes for Biomass Production and Composition
Source: PLoS One. 2015 Jul 7;10(7):e0132120. doi: 10.1371/journal.pone.0132120 (PMC4495061; doi:10.1371/journal.pone.0132120)
Supplement: S7 Table — (XLS) [file pone.0132120.s015.xls]

## Sheet: Sheet1
Table: The geographic origin and a short description of the maize inbred lines used in this large scale polymorphism discovery
Population ID	Genotype	Maturity group	Breeding subgroup	Geographical origin	Genetic pool	Description	Fresh weight	Dry weight	WUE_FW	WUE_DW	Plant height
1	B101	Late	SS	USA	Dent
2	B102	Late	NSS	USA	Dent		241.071	17.3518	0.0906271	0.00652316	113.992
3	B106	Late	NSS	USA	Dent		288.97	20.6407	0.0934925	0.00667802	151.036
4	B111	Late	SS	USA	Dent		166.705	12.5279	0.0814646	0.00612207	111.023
5	B73	Intermediate	SS	USA	Dent	Stiff Stalk inbred	226.346	16.6058	0.0713957	0.00523793	135.023
6	DK105		European flint	Germany	Flint		265.416	21.4782	0.0868577	0.00702874	153.234
7	EA1070		European flint	Spain	Flint	A line Southern Spain line	156.583	11.9407	0.0790603	0.00602895	94.6632
8	EP1		European flint	Spain	Flint	Lizárgarate
9	F2		European flint	France	Flint	Lacaune	329.08	25.3573	0.0894807	0.00689497	178.29
10	F353	Early	NSS	France	Dent	Central early dent, (dent synth SFP141 of iodent INRA lines, iodent based on mks)	216.112	16.9099	0.0862738	0.00675057	135.595
11	F7		European flint	France	Flint	Lacaune	360.842	35.7731	0.0674528	0.00668714	216.454
12	F7059	Early	NSS	France	Dent		283.241	26.3782	0.0776764	0.00723397	168.764
13	Lo11		European flint	Italy	Flint	An Italian line
14	Mo17	Late	NSS	USA	Dent	lancaster	172.196	13.2884	0.116837	0.00901636	111.841
15	Mo24W	Late	NSS	USA	Dent
16	NC358	Late	T	USA	Dent		168.27	13.7599	0.0798801	0.00653198	131.144
17	P068	Late	NSS	Germany	Dent		242.883	20.6115	0.109109	0.00925921	116.543
18	P107	Late	NSS	Germany	Dent		229.144	18.4448	0.0818393	0.00658761	155.095
19	P128	Late	NSS	Germany	Dent		187.545	18.0615	0.0813805	0.00783731	140.244
20	PH207		NSS	USA	Dent	Iodent Inbred	166.583	13.8032	0.0899633	0.00745441	90.2052
21	UH007	Early	European flint	Germany	Flint		197.06	17.9329	0.0746951	0.00679742	158.884
Where SS=stiff stalk, T=tropical line, and NSS=non-stiff stalk							WUE_FW = water use effeciency relative to fresh weight
							WUE_DW = water use effeciency relative to dry weight
